# Supplementary material
Source: publisher site journal article supplement (https://static.cambridge.org/content/id/urn:cambridge.org:id:article:S0008347X20000152/resource/name/S0008347X20000152supp001.pdf)
Supplement: Supplementary file 1 [file S0008347X20000152supp001.pdf]

**Supplementary Table 1.** Orchards in Nova Scotia, Ontario, and British Columbia monitored for *Dasineura mali* in 2014–2016.

| Province                         | Sample site                    | Latitude  | Longitude  | Years sampled    |
|----------------------------------|--------------------------------|-----------|------------|------------------|
| <b>Nova Scotia</b>               |                                |           |            |                  |
|                                  | Nichols (Harmony)              | 44.983972 | -64.783509 | 2014, 2015, 2016 |
|                                  | Nichols (house)                | 44.980908 | -64.755330 | 2014, 2015, 2016 |
|                                  | Killam                         | 45.101827 | -64.675583 | 2014, 2015       |
|                                  | Peill                          | 45.109747 | -64.388440 | 2014, 2015       |
|                                  | Boates                         | 45.105632 | -64.654762 | 2014, 2015, 2016 |
|                                  | Oulton                         | 45.112920 | -64.395305 | 2014, 2015, 2016 |
|                                  | Embree                         | 45.086789 | -64.438847 | 2014, 2015, 2016 |
|                                  | Bowlby (Victoria Road)         | 45.042050 | -64.845584 | 2015, 2016       |
|                                  | Bowlby (house)                 | 45.050041 | -64.876354 | 2015, 2016       |
|                                  | Stewart                        | 45.096083 | -64.284287 | 2015, 2016       |
|                                  | Penner (Morden)                | 45.034510 | -64.863929 | 2015, 2016       |
|                                  | Penner (Base of Mountain)      | 45.034510 | -64.719752 | 2015, 2016       |
|                                  | Bishop                         | 45.080041 | -64.411746 | 2014             |
| <b>Ontario</b>                   |                                |           |            |                  |
| Eastern                          | Dekok                          | 45.36835  | -75.942285 | 2015, 2016       |
|                                  | Pingle                         | 43.951    | -78.79     | 2014, 2016       |
|                                  | Hy Hope                        | 44.009    | -79.048    | 2016             |
|                                  | Nature's Bounty                | 44.033    | -79.005    | 2016             |
|                                  | Campbell                       | 44.109949 | -77.469392 | 2014             |
|                                  | Deleeuw                        | 44.003031 | -77.960289 | 2014             |
|                                  | Algoma                         | 43.949746 | -78.671825 | 2014             |
|                                  | Rowe                           | 43.960284 | -78.633739 | 2014             |
| Southwestern                     | Mountainview (Niagara)         | 43.175    | -79.498    | 2014, 2015, 2016 |
|                                  | Lincoln Line (Niagara)         | 43.043    | -79.431    | 2014, 2015, 2016 |
|                                  | Hahn (Simcoe)                  | 42.822251 | -80.352497 | 2014, 2015, 2016 |
|                                  | Hedges 1 (Simcoe)              | 42.9285   | -80.3979   | 2016             |
|                                  | Hedges 2 (Simcoe)              | 42.9329   | -80.3963   | 2016             |
|                                  | Hedges 3 (Simcoe)              | 42.9377   | -80.3976   | 2015, 2016       |
|                                  | Moore (Simcoe)                 | 43.974837 | -78.092679 | 2014, 2015,      |
|                                  | Wilmot (Simcoe)                | 43.927823 | -78.610465 | 2015,            |
|                                  | Porteous (Simcoe)              | 42.888767 | -80.231333 | 2015,            |
|                                  | Fiedler (Simcoe)               | 42.776529 | -80.333042 | 2015,            |
|                                  | Schuyler (Simcoe)              | 42.863361 | -80.275488 | 2015,            |
|                                  | Boston Unincorporated (Simcoe) | 42.990109 | -80.27319  | 2014             |
|                                  | Lingwood (Simcoe)              | 42.893222 | -80.232677 | 2014             |
|                                  | Ireland (Simcoe)               | 42.821495 | -80.329494 | 2014             |
| <b>British Columbia</b>          |                                |           |            |                  |
| Fraser valley                    | Abbotsford 1 (Fraser)          | 49.0064   | -122.2930  | 2014, 2015, 2016 |
|                                  | Abbotsford 2 (Fraser)          | 49.0352   | -122.2448  | 2014, 2015, 2016 |
|                                  | Surrey (Fraser)                | 49.0653   | -122.8411  |                  |
| Okanagan and Similkameen valleys | Oliver 1                       | 49.1633   | -119.5834  | 2014, 2015, 2016 |
|                                  | Oliver 2                       | 49.1023   | -119.5651  | 2014, 2015, 2016 |
|                                  | Keremeos 1                     | 49.2097   | -119.8049  | 2014, 2015, 2016 |
|                                  | Keremeos 2                     | 49.1650   | -119.7318  | 2014, 2015, 2016 |
|                                  | Naramata 1                     | 49.5343   | -119.5666  | 2014, 2015, 2016 |
|                                  | Naramata 2                     | 49.6144   | -119.5917  | 2014, 2015, 2016 |
|                                  | Summerland 1                   | 49.5658   | -119.6309  | 2014, 2015, 2016 |
|                                  | Summerland 2                   | 49.5804   | -119.6384  | 2014, 2015, 2016 |
|                                  | Kelowna 1                      | 49.8540   | -119.4410  | 2014, 2015, 2016 |
|                                  | Kelowna 2                      | 49.8754   | -119.4158  | 2014, 2015, 2016 |
